# Supplementary material for: A system-wide approach to explaining variation in potentially avoidable emergency admissions: national ecological study
Source: PubMed Central journal article supplement — BMJ Qual Saf. 2013 Jul 31;23(1):47–55. doi: 10.1136/bmjqs-2013-002003 (PMC3888597; doi:10.1136/bmjqs-2013-002003), 2013-07-31
Supplement: bmjqs-2013-002003-s1.pdf [file bmjqs-2013-002003-s1.pdf]

**Table 2 Description of factors tested and explanatory power in the univariate linear regression**

| Factor                                                                    | Source                    | Median (IQR) | Range | Pearson's R <sup>2</sup> | p-value | Direction of correlation |
|---------------------------------------------------------------------------|---------------------------|--------------|-------|--------------------------|---------|--------------------------|
| <b>Population</b>                                                         |                           |              |       |                          |         |                          |
| INCOME %<br>population in an area that live in income deprived families   | IMD 2010 [17]             | 15% (11,19)  | 7-33  | 60%                      | <0.001  | +                        |
| EMPLOYMENT %<br>population with employment deprivation                    | IMD 2010 [17]             | 6% (5, 8)    | 3-12  | 72%                      | <0.001  | +                        |
| ETHNICITY %<br>population minority ethnic                                 | ONS [19]                  | 9% (5, 20)   | 3-63  | 9%                       | <0.001  | +                        |
| OVER75 %<br>population aged 75 or over                                    | ONS [20]                  | 7% (7, 9)    | 3-13  | 18%                      | <0.001  | -                        |
| ALONE %<br>pensioners living alone                                        | ONS [21]                  | 6% (5, 6)    | 3-8   | <1%                      | 0.547   | +                        |
| <b>Geography</b>                                                          |                           |              |       |                          |         |                          |
| URBAN/RURAL                                                               | ONS [22]                  | No PCTs (%)  |       | 29%                      | <0.001  | -                        |
| major urban                                                               |                           | 58 (39%)     |       |                          |         |                          |
| large urban                                                               |                           | 19 (13%)     |       |                          |         |                          |
| other urban                                                               |                           | 23 (15%)     |       |                          |         |                          |
| sign'nt rural                                                             |                           | 26 (17%)     |       |                          |         |                          |
| rural 50%                                                                 |                           | 22 (15%)     |       |                          |         |                          |
| rural 80%                                                                 |                           | 2 ( 1%)      |       |                          |         |                          |
| <b>Health<sup>+</sup></b>                                                 |                           |              |       |                          |         |                          |
| CHD prevalence<br>Coronary Heart Disease                                  | QOF [23]                  | 4% (3, 4)    | 1-5   | 3%                       | 0.032   | +                        |
| COPD prevalence of COPD                                                   | QOF [23]                  | 2% (1, 2)    | 1-3   | 20%                      | <0.001  | +                        |
| DIABETES<br>prevalence Diabetes                                           | QOF [23]                  | 5% (5, 6)    | 3-9   | 18%                      | <0.001  | +                        |
| <b>Hospital</b>                                                           |                           |              |       |                          |         |                          |
| MANAGEMENT/CODING<br>% emergency admissions with length of stay <1 day    | HES [15]                  | 28% (24, 30) | 14-41 | 16%                      | <0.001  | +                        |
| MANAGEMENT<br>% population waiting 4 or more weeks for elective admission | Department of Health [24] | 62% (53,68)  | 35-98 | 1%                       | 0.198   | -                        |

|                                                                                                                      |                                  |                       |         |      |                |     |
|----------------------------------------------------------------------------------------------------------------------|----------------------------------|-----------------------|---------|------|----------------|-----|
| <b>Emergency departments</b>                                                                                         |                                  |                       |         |      |                |     |
| EDDEMAND Directly age sex and deprivation standardised rate of ED attendances per 100,000 population                 | NHS Atlas of Variation 2011 [18] | 275 (241,324)         | 149-909 | 15%  | <0.001         | +   |
| EDCONVERSION Directly age sex deprivation standardised rate of conversion from ED attendance to emergency admissions | NHS Atlas of Variation 2011 [18] | 100 (88,112)          | 70-148  | 7%   | 0.001          | +   |
| <b>Community</b>                                                                                                     |                                  |                       |         |      |                |     |
| CAREHOME Admission rate for people aged >74 from nursing home or residential care home settings per 10,000           | NHS Atlas of Variation 2011 [18] | 12 (6, 29)            | 1-193   | 4%   | 0.013          | +   |
| <b>General practice</b>                                                                                              |                                  |                       |         |      |                |     |
| GPSUPPLY GPs per 100,000 population                                                                                  | London Health Observatory [25]   | 69 (64, 75)           | 54-99   | 0%   | 0.855          | +   |
| GPACCESS1 %GP single handed                                                                                          | Information Centre [26]          | 13% (7, 23)           | 0-48    | 17%  | <0.001         | +   |
| GPACCESS2 % practices offering extended opening hours                                                                | Department of Health [27]        | 75% (69, 86)          | 39-100  | 0%   | 0.901          | -   |
| GPACCESS3 %able to see GP in 48 hours                                                                                | GP survey [28]                   | 80% (77,83)           | 71-89   | 25%  | <0.001         | -   |
| GPADMISSION % admissions from general practice                                                                       | HES [15]                         | 18% ( 7,26)           | 0       | 11%  | <0.001         | -   |
| GP QUALITY QOF indicators                                                                                            | QOF [23]                         | Six indicators tested |         | 0-9% | <0.001 - 0.570 | -\$ |
| <b>General Practice out of hours</b>                                                                                 |                                  |                       |         |      |                |     |
| GPOOH1 % know how to contact GP out of hours                                                                         | GP survey [28]                   | 66% (62, 69)          | 48-79   | 10%  | <0.001         | -   |
| GPOOH2 %of GP ooh users reporting 'very easy' to                                                                     | GP survey [28]                   | 38% (34-42)           | 20-55   | 1%   | 0.231          | -   |

| contact by phone                                            |                                |              |       |     |        |   |
|-------------------------------------------------------------|--------------------------------|--------------|-------|-----|--------|---|
| <b>Ambulance service</b>                                    |                                |              |       |     |        |   |
| AMBRESPONSE<br>%category A<br>response within 8<br>minutes* | Informati<br>on Centre<br>[29] | 75% (73, 75) | 71-78 | 13% | <0.001 | - |
| AMBTRANSPORT<br>%not transported to<br>hospital*            | Informati<br>on Centre<br>[29] | 21% (16, 30) | 8-34  | 35% | <0.001 | - |

+ prevalence of 3 of the 14 conditions in the age sex adjusted admission rate.

\$ for the one statistically significant correlation
